# Supplementary material for: Interfacial structure and electrochemical stability of electrolytes: methylene methanedisulfonate as an additive
Source: Royal Society of Chemistry journal article supplement (doi:10.1039/c8cp06548a), 2018-11-14
Supplement: c8cp06548a1.pdf [file c8cp06548a1.pdf]

## Interfacial Structure and Electrochemical Stability of Electrolytes: Methylene Methanedisulfonate as Additive

Yamin Wang, Xiaoying Yu, Yingchun Liu, and Qi Wang\*

Department of Chemistry, Zhejiang University, Hangzhou 310027, People's Republic of China

\* Q. Wang. Fax: +86 571 87951895. E-mail: qiawang@zju.edu.cn

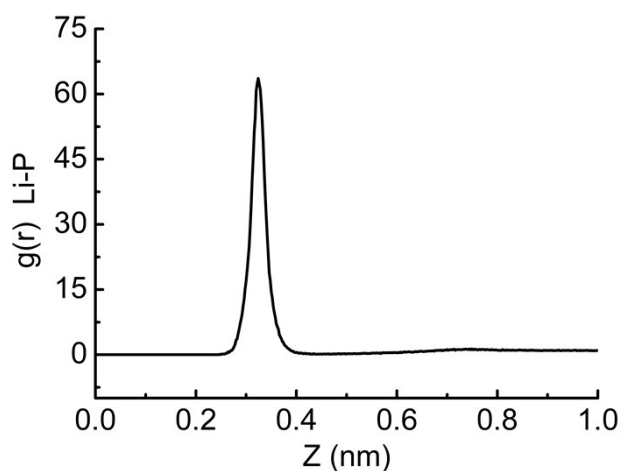

Figure S1. Radial distribution function for  $\text{Li}^+$  with  $\text{PF}_6^-$  (Li-P) in MMDS-containing electrolytes.

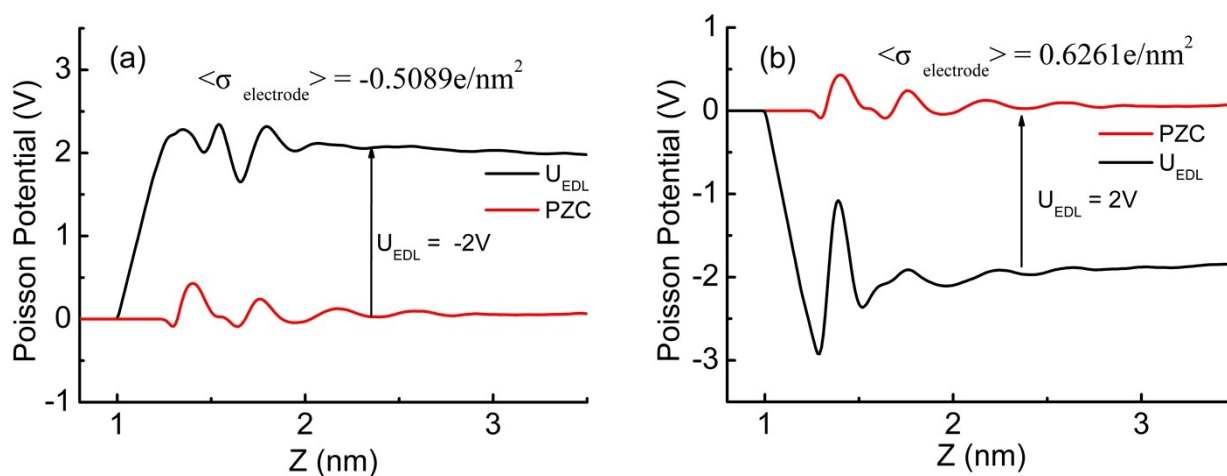

Figure S2. The representative examples of Poisson potential for the MMDS-containing electrolytes. Here, PZC is  $-0.08\text{V}$ , a negative value indicates that the positively charged  $\text{Li}^+$  ion in the electrolyte has a lower propensity for the electrode surface than the negatively charged species.

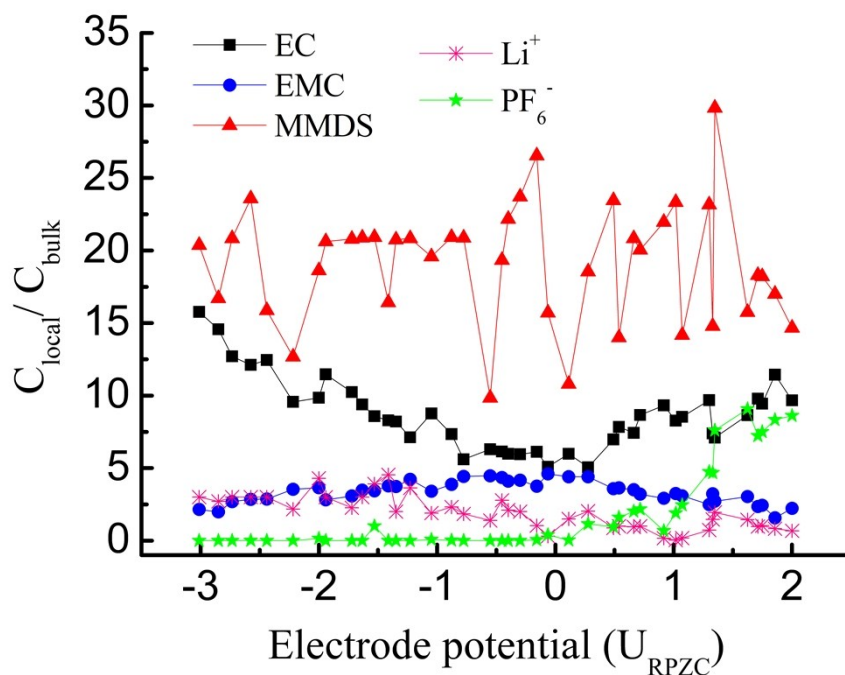

Figure S3. Relative concentrations ( $C_{\text{local}}/C_{\text{bulk}}$ ) of components as a function of electrode potential in MMDS-containing electrolytes, where  $C_{\text{local}}$  is defined as the interfacial concentration within 0.6 nm.  $\text{PF}_6^-$  population follows expected charge-repulsion behavior, the density of  $\text{Li}^+$  in the surface layer in contrast does not decrease on the positive plate with increasing positive potential. However, this trend is still in accord with the reported work (see Figure 6 in the work<sup>1</sup> by Oleg Borodin and Janel Vatmanu).

Table S1. The Orbit Energy of solvent molecules and their affinity to electrode surface ( $C_{\text{local}}/C_{\text{bulk}}$ ) in the interfacial width of 0.45 nm.

| Molecules | Orbit Energy |           | $C_{\text{local}}/C_{\text{bulk}}$ |      |      |
|-----------|--------------|-----------|------------------------------------|------|------|
|           | HOMO (eV)    | LUMO (eV) | -1 V                               | 0 V  | 1 V  |
| FEC       | -8.975       | -0.386    | 5.00                               | 4.17 | 7.02 |
| EC        | -8.778       | -0.072    | 5.79                               | 5.43 | 5.59 |
| EMC       | -8.855       | -0.068    | 3.48                               | 3.84 | 3.00 |

In FEC-containing electrolytes, there is no significant difference in orbit energy and the affinity between FEC additive and solvents (EC or EMC). These behaviors are dissimilar to those in MMDS-containing electrolytes, where the LUMO energy of MMDS is 1.4eV lower than that of solvents (see Table 3), and the relative concentration ( $C_{\text{local}}/C_{\text{bulk}}$ ) of additive MMDS is much higher than any of solvents no matter what the electrode potential is (see Figure 3 or Figure S3).

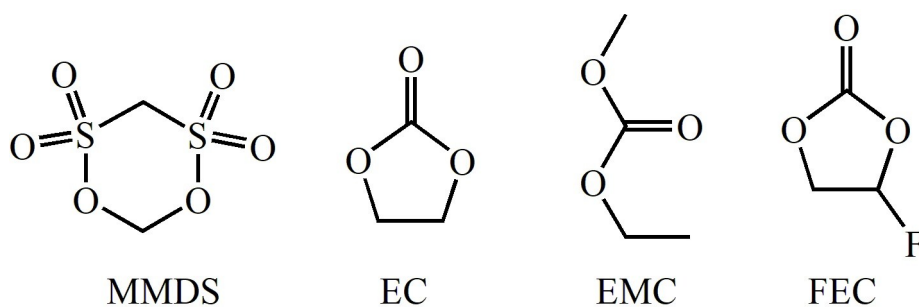

Figure S4. Structure of electrolyte molecules

## Key Force Field parameters

Table S2. Nonbonded Lennard-Jones parameters

| Atom        | $\sigma$ (Å) | $\epsilon$ (kcal mol <sup>-1</sup> ) |
|-------------|--------------|--------------------------------------|
| C (sp3)     | 3.400        | 0.458                                |
| C (sp2)     | 3.400        | 0.360                                |
| H (in MMDS) | 2.293        | 0.066                                |
| H (-CH-O)   | 2.650        | 0.066                                |
| H           | 2.471        | 0.066                                |
| O=          | 2.960        | 0.879                                |
| O-          | 3.000        | 0.711                                |

Energy-minimized *ab initio* structure and atom charge

! ATOM:

!! index (int): atom index

!! name (str): atom name (required)

!! type (str): atomtype name

!! charge (float, e): partial atomic charge

!! x (float, angstrom): atom coordinate

!! y (float, angstrom): atom coordinate

!! z (float, angstrom): atom coordinate

#### MOLECULE EC

| index | name | type | charge   | x         | y         | z         | ! 10 |
|-------|------|------|----------|-----------|-----------|-----------|------|
| 1     | C1   | c    | 0.84495  | 0.852909  | -0.000012 | -0.000195 |      |
| 2     | O1   | os   | -0.37347 | 0.073901  | 1.114400  | -0.099196 |      |
| 3     | O2   | os   | -0.37347 | 0.073873  | -1.114396 | 0.099123  |      |
| 4     | O3   | o    | -0.54569 | 2.047751  | -0.000011 | 0.000122  |      |
| 5     | C2   | c3   | 0.08932  | -1.305804 | 0.758294  | 0.110486  |      |
| 6     | H1   | h1   | 0.06726  | -1.586511 | 1.039717  | 1.134701  |      |
| 7     | H2   | h1   | 0.06726  | -1.919381 | 1.310006  | -0.609218 |      |
| 8     | C3   | c3   | 0.08932  | -1.305820 | -0.758281 | -0.110403 |      |
| 9     | H3   | h1   | 0.06726  | -1.586677 | -1.039710 | -1.134579 |      |
| 10    | H4   | h1   | 0.06726  | -1.919342 | -1.309963 | 0.609376  |      |

#### MOLECULE EMC

| index | name | type | charge   | x         | y         | z         | ! 15 |
|-------|------|------|----------|-----------|-----------|-----------|------|
| 1     | C1   | c    | 1.00191  | -0.544561 | 0.164360  | 0.000006  |      |
| 2     | O1   | o    | -0.61727 | -0.734971 | 1.362517  | -0.000056 |      |
| 3     | O2   | os   | -0.55116 | 0.647234  | -0.447869 | 0.000098  |      |
| 4     | O3   | os   | -0.39105 | -1.497690 | -0.781881 | 0.000025  |      |

|    |    |    |          |           |           |           |
|----|----|----|----------|-----------|-----------|-----------|
| 5  | C2 | c3 | 0.50520  | 1.799892  | 0.434646  | 0.000105  |
| 6  | H1 | h1 | -0.05682 | 1.747278  | 1.076836  | -0.888573 |
| 7  | H2 | h1 | -0.05682 | 1.747440  | 1.076592  | 0.888973  |
| 8  | C3 | c3 | -0.00991 | -2.848210 | -0.281121 | -0.000041 |
| 9  | H3 | h1 | 0.07455  | -3.031369 | 0.325729  | -0.894888 |
| 10 | H4 | h1 | 0.07455  | -3.482875 | -1.171546 | -0.000290 |
| 11 | H5 | h1 | 0.07455  | -3.031580 | 0.325361  | 0.895016  |
| 12 | C4 | c3 | -0.25170 | 3.037307  | -0.439960 | -0.000115 |
| 13 | H6 | hc | 0.06799  | 3.932394  | 0.197185  | -0.000081 |
| 14 | H7 | hc | 0.06799  | 3.067841  | -1.080054 | 0.891295  |
| 15 | H8 | hc | 0.06799  | 3.067716  | -1.079786 | -0.891721 |

#### MOLECULE MMDS

| index | name | type | charge    | x         | y         | z         | ! 14 |
|-------|------|------|-----------|-----------|-----------|-----------|------|
| 1     | S1   | s6   | 0.879830  | 0.869930  | 1.072471  | -0.268633 |      |
| 2     | O1   | o    | -0.395762 | 2.032635  | 1.660197  | -0.948647 |      |
| 3     | O2   | o    | -0.395762 | 0.000000  | 2.155627  | 0.210655  |      |
| 4     | C1   | c3   | -0.509412 | 0.000000  | 0.000000  | -1.360913 |      |
| 5     | H1   | h2   | 0.258076  | 0.624365  | -0.605392 | -1.984266 |      |
| 6     | H2   | h2   | 0.258076  | -0.624365 | 0.605392  | -1.984266 |      |
| 7     | S2   | s6   | 0.879830  | -0.869930 | -1.072471 | -0.268633 |      |
| 8     | O3   | o    | -0.395762 | -2.032635 | -1.660197 | -0.948647 |      |
| 9     | O4   | o    | -0.395762 | 0.000000  | -2.155627 | 0.210655  |      |
| 10    | O5   | os   | -0.361909 | -1.237805 | -0.147095 | 1.035658  |      |

|    |    |    |           |           |           |          |
|----|----|----|-----------|-----------|-----------|----------|
| 11 | O6 | os | -0.361909 | 1.237805  | 0.147095  | 1.035658 |
| 12 | C2 | c3 | 0.357021  | 0.000000  | 0.000000  | 1.842685 |
| 13 | H3 | h2 | 0.091723  | -0.124603 | 0.868060  | 2.455748 |
| 14 | H4 | h2 | 0.091723  | 0.124603  | -0.868060 | 2.455748 |

### References:

- 1 J. Vatamanu, O. Borodin and G. D. Smith, *J. Phys. Chem. C*, 2012, **116**, 1114-1121.
